# Supplementary material for: Discrete analysis of camelid variable domains: sequences, structures, and in-silico structure prediction
Source: PeerJ journal article supplement (doi:10.7717/peerj.8408), 2020-03-06
Supplement: Supplementary_Figure_01.pdf [file Supplementary_Figure_01.pdf]

Genomic track visualization showing genomic coordinates, gene annotations, and variant data for a specific region. The table contains multiple columns for gene names, coordinates, and variant details. The visualization includes a yellow bar at the bottom indicating a specific variant or region of interest.
